# Supplementary material for: Cadmium adipate coordination polymers prepared with isomeric pyridylamide precursors: pH-dependent in situ reaction chemistry and divergent dimensionalities
Source: Royal Society of Chemistry journal article supplement (doi:10.1039/c2ce26583d), 2013-01-01

Table S1. Selected Bond distance (Å) and angle (°) data for **1**.

|                         |          |                                       |          |
|-------------------------|----------|---------------------------------------|----------|
| Cd1–O7                  | 2.319(7) | O4–Cd1–O3                             | 52.9(2)  |
| Cd1–N3                  | 2.325(9) | O7–Cd1–O6                             | 85.6(2)  |
| Cd1–O5                  | 2.335(6) | N3–Cd1–O6                             | 91.2(3)  |
| Cd1–N1 <sup>i</sup>     | 2.377(8) | O5–Cd1–O6                             | 54.0(2)  |
| Cd1–O4                  | 2.391(7) | N1 <sup>i</sup> –Cd1–O6               | 83.2(2)  |
| Cd1–O3                  | 2.468(7) | O4–Cd1–O6                             | 167.8(2) |
| Cd1–O6                  | 2.507(7) | O3–Cd1–O6                             | 138.6(2) |
| Cd2–O12                 | 2.288(8) | O12–Cd2–O10 <sup>i</sup>              | 82.4(3)  |
| Cd2–O10 <sup>i</sup>    | 2.317(7) | O12–Cd2–O11                           | 169.1(3) |
| Cd2–O11                 | 2.337(8) | O10 <sup>i</sup> –Cd2–O11             | 87.2(3)  |
| Cd2–N2                  | 2.342(8) | O12–Cd2–N2                            | 98.4(3)  |
| Cd2–O2                  | 2.375(8) | O10 <sup>i</sup> –Cd2–N2              | 137.8(3) |
| Cd2–O1                  | 2.457(7) | O11–Cd2–N2                            | 87.4(3)  |
| Cd2–O9 <sup>i</sup>     | 2.559(7) | O12–Cd2–O2                            | 100.3(3) |
| O7–Cd1–N3               | 174.3(3) | O10 <sup>i</sup> –Cd2–O2              | 137.2(3) |
| O7–Cd1–O5               | 81.6(2)  | O11–Cd2–O2                            | 89.4(3)  |
| N3–Cd1–O5               | 100.3(3) | N2–Cd2–O2                             | 84.5(3)  |
| O7–Cd1–N1 <sup>i</sup>  | 86.7(2)  | O12–Cd2–O1                            | 87.5(3)  |
| N3–Cd1–N1 <sup>i</sup>  | 88.2(3)  | O10 <sup>i</sup> –Cd2–O1              | 84.6(2)  |
| O5–Cd1–N1 <sup>i</sup>  | 136.2(2) | O11–Cd2–O1                            | 94.5(3)  |
| O7–Cd1–O4               | 89.0(2)  | N2–Cd2–O1                             | 137.5(3) |
| N3–Cd1–O4               | 93.2(3)  | O2–Cd2–O1                             | 53.1(2)  |
| O5–Cd1–O4               | 135.8(2) | O12–Cd2–O9 <sup>i</sup>               | 87.0(3)  |
| N1 <sup>i</sup> –Cd1–O4 | 85.6(2)  | O10 <sup>i</sup> –Cd2–O9 <sup>i</sup> | 53.6(2)  |
| O7–Cd1–O3               | 96.7(2)  | O11–Cd2–O9 <sup>i</sup>               | 84.4(2)  |
| N3–Cd1–O3               | 88.8(3)  | N2–Cd2–O9 <sup>i</sup>                | 84.3(2)  |
| O5–Cd1–O3               | 85.3(2)  | O2–Cd2–O9 <sup>i</sup>                | 167.4(3) |
| N1 <sup>i</sup> –Cd1–O3 | 138.1(2) | O1–Cd2–O9 <sup>i</sup>                | 138.2(2) |

Symmetry code to generate equivalent atoms: *i*: *x* + 1, *y*, *z*.

Table S2. Hydrogen bonding parameters in **1–4**.

| <i>D</i> –H··· <i>A</i> | <i>d</i> (H··· <i>A</i> ) | <i>d</i> ( <i>D</i> ··· <i>A</i> ) | ∠ <i>DHA</i> | symmetry transformation for <i>A</i> |
|-------------------------|---------------------------|------------------------------------|--------------|--------------------------------------|
| <b>1</b>                |                           |                                    |              |                                      |
| O3W–H3WA···O11          | 2.00(4)                   | 2.838(12)                          | 170(15)      | -x + 1, -y + 1, -z + 2               |
| O3W–H3WB···O2W          | 2.37(6)                   | 3.157(18)                          | 156(11)      |                                      |
| O4W–H4WA···O5W          | 1.89(3)                   | 2.723(11)                          | 166(11)      |                                      |
| O4W–H4WB···O3W          | 2.16(10)                  | 2.784(13)                          | 131(11)      |                                      |
| O5W–H5WA···O7           | 2.06(5)                   | 2.852(10)                          | 154(8)       | -x + 1, -y + 1, -z + 1               |
| O5W–H5WB···O3           | 1.92(3)                   | 2.773(10)                          | 177(12)      | x + 1, y, z                          |
| O7–H7A···O4             | 1.83(3)                   | 2.674(9)                           | 170(8)       | -x + 1, -y + 1, -z + 1               |
| O7–H7B···O5             | 1.88(3)                   | 2.728(9)                           | 171(10)      | -x, -y + 1, -z + 1                   |
| O11–H11A···O10          | 1.89(3)                   | 2.723(10)                          | 167(9)       | -x, -y + 1, -z + 2                   |
| O11–H11B···O2           | 1.90(2)                   | 2.747(11)                          | 176(11)      | -x, -y + 1, -z + 2                   |
| O12–H12A···O4W          | 1.90(3)                   | 2.741(11)                          | 172(12)      | -x + 1, -y + 1, -z + 2               |
| O12–H12B···O2W          | 1.93(5)                   | 2.733(13)                          | 158(11)      |                                      |
| N4–H4NA···O5W           | 2.27(5)                   | 3.088(13)                          | 152(10)      | -x + 1, -y + 2, -z + 1               |
| N4–H4NB···O9            | 2.32(6)                   | 3.064(12)                          | 141(9)       | x + 1, y, z – 1                      |
| <b>2</b>                |                           |                                    |              |                                      |
| O1W–H1WA···O2           | 2.12(2)                   | 2.933(4)                           | 166(4)       | x + 1, y, z                          |
| O1W–H1WB···O6           | 1.92(2)                   | 2.748(4)                           | 168(5)       |                                      |
| O2W–H2WA···O3           | 1.95(2)                   | 2.768(4)                           | 167(4)       |                                      |
| O2W–H2WB···O1W          | 2.08(2)                   | 2.921(4)                           | 170(4)       | -x+1/2, y+1/2, -z+1/2                |
| N2–H2N···O2W            | 1.98(2)                   | 2.855(5)                           | 163(4)       | -x + 2, -y + 1, -z + 1               |
| <b>3</b>                |                           |                                    |              |                                      |
| N2–H2N···O5             | 2.09                      | 2.892(8)                           | 151.4        | -x + 3, -y + 1, -z                   |
| N5–H5N···O6             | 2.06                      | 2.867(8)                           | 151.3        |                                      |
| O1W–H1WA···O2W          | 2.00(4)                   | 2.815(8)                           | 159(8)       | -x + 3, -y + 2, -z                   |
| O1W–H1WB···O3           | 1.97(3)                   | 2.820(8)                           | 168(9)       |                                      |
| O2W–H2WA···O2           | 2.08                      | 2.933(8)                           | 179.5        |                                      |
| O2W–H2WA···O10          | 1.99(5)                   | 2.766(8)                           | 150(9)       | -x + 1, -y + 1, -z + 1               |
| <b>4</b>                |                           |                                    |              |                                      |
| O1W–H1WA···O2           | 2.047(16)                 | 2.868(2)                           | 170(2)       |                                      |
| O1W–H1WB···N3           | 2.038(15)                 | 2.865(2)                           | 172(2)       | -x + 1, -y – 1, -z + 1               |
| O4–H4A···O2             | 1.836(15)                 | 2.668(2)                           | 168(2)       | -x, -y, -z                           |
| O4–H4B···O3             | 1.918(15)                 | 2.7312(19)                         | 168(2)       | -x + 1, -y, -z                       |
| N2–H2N···O1W            | 2.029(17)                 | 2.837(2)                           | 156(2)       | x, y – 1, z                          |

Table S3. Selected Bond distance (Å) and angle (°) data for **2**.

|                                       |            |                          |            |
|---------------------------------------|------------|--------------------------|------------|
| Cd1–N4 <sup>i</sup>                   | 2.340(3)   | O5–Cd1–N3 <sup>ii</sup>  | 139.16(10) |
| Cd1–O5                                | 2.348(3)   | N1–Cd1–N3 <sup>ii</sup>  | 88.75(11)  |
| Cd1–N1                                | 2.349(3)   | O2–Cd1–N3 <sup>ii</sup>  | 137.70(9)  |
| Cd1–O2                                | 2.370(2)   | N4 <sup>i</sup> –Cd1–O6  | 95.96(10)  |
| Cd1–N3 <sup>ii</sup>                  | 2.380(3)   | O5–Cd1–O6                | 53.58(9)   |
| Cd1–O6                                | 2.478(3)   | N1–Cd1–O6                | 91.14(10)  |
| Cd1–O3                                | 2.514(2)   | O2–Cd1–O6                | 136.71(9)  |
| N4 <sup>i</sup> –Cd1–O5               | 98.15(11)  | N3 <sup>ii</sup> –Cd1–O6 | 85.58(9)   |
| N4 <sup>i</sup> –Cd1–N1               | 170.02(11) | N4 <sup>i</sup> –Cd1–O3  | 88.28(10)  |
| O5–Cd1–N1                             | 91.71(11)  | O5–Cd1–O3                | 136.21(9)  |
| N4 <sup>i</sup> –Cd1–O2               | 88.79(11)  | N1–Cd1–O3                | 83.49(10)  |
| O5–Cd1–O2                             | 83.13(9)   | O2–Cd1–O3                | 53.60(8)   |
| N1–Cd1–O2                             | 90.85(11)  | N3 <sup>ii</sup> –Cd1–O3 | 84.39(9)   |
| N4 <sup>i</sup> –Cd1–N3 <sup>ii</sup> | 84.83(11)  | O6–Cd1–O3                | 168.72(9)  |

Symmetry codes to generate equivalent atoms: *i*:  $-x + 1/2, y - 1/2, -z + 1/2$ . *ii*:  $x + 1, y, z$ .

Table S4. Selected Bond distance (Å) and angle (°) data for **3**.

|                                          |            |                                          |            |
|------------------------------------------|------------|------------------------------------------|------------|
| Cd1–O1 <sup>i</sup>                      | 2.319(5)   | N1–Cd2–O4 <sup>iii</sup>                 | 99.9(2)    |
| Cd1–N4                                   | 2.322(6)   | N1–Cd2–O7 <sup>iv</sup>                  | 84.8(2)    |
| Cd1–O9                                   | 2.333(5)   | O4 <sup>iii</sup> –Cd2–O7 <sup>iv</sup>  | 128.10(17) |
| Cd1–N3                                   | 2.352(6)   | N1–Cd2–N6 <sup>v</sup>                   | 164.9(2)   |
| Cd1–O6 <sup>ii</sup>                     | 2.386(5)   | O4 <sup>iii</sup> –Cd2–N6 <sup>v</sup>   | 94.7(2)    |
| Cd1–O10 <sup>ii</sup>                    | 2.461(5)   | O7 <sup>iv</sup> –Cd2–N6                 | 83.4(2)    |
| Cd1–O1                                   | 2.475(5)   | N1–Cd2–O5                                | 96.28(19)  |
| Cd2–N1                                   | 2.317(6)   | O4–Cd2–O5                                | 86.77(17)  |
| Cd2–O4 <sup>iii</sup>                    | 2.346(5)   | O7 <sup>iv</sup> –Cd2–O5                 | 144.55(17) |
| Cd2–O7 <sup>iv</sup>                     | 2.346(5)   | N6 <sup>v</sup> –Cd2–O5                  | 88.1(2)    |
| Cd2–N6 <sup>v</sup>                      | 2.347(6)   | N1–Cd2–O7 <sup>iii</sup>                 | 95.1(2)    |
| Cd2–O5                                   | 2.365(5)   | O4–Cd2–O7 <sup>iii</sup>                 | 52.84(17)  |
| Cd2–O7 <sup>iii</sup>                    | 2.467(5)   | O7 <sup>iv</sup> –Cd2–O7 <sup>iii</sup>  | 75.29(19)  |
| Cd2–O3                                   | 2.470(5)   | N6 <sup>v</sup> –Cd2–O7 <sup>iii</sup>   | 90.8(2)    |
| O1 <sup>i</sup> –Cd1–N4                  | 86.7(2)    | O5–Cd2–O7 <sup>iii</sup>                 | 139.37(16) |
| O1 <sup>i</sup> –Cd1–O9                  | 128.14(19) | N1–Cd2–O3                                | 81.8(2)    |
| N4–Cd1–O9                                | 99.9(2)    | O4 <sup>iii</sup> –Cd2–O3                | 140.39(17) |
| O1 <sup>i</sup> –Cd1–N3                  | 83.8(2)    | O7 <sup>iv</sup> –Cd2–O3                 | 91.51(17)  |
| N4–Cd1–N3                                | 167.2(2)   | N6 <sup>v</sup> –Cd2–O3                  | 89.2(2)    |
| O9–Cd1–N3                                | 92.7(2)    | O5–Cd2–O3                                | 53.92(16)  |
| O1 <sup>i</sup> –Cd1–O6 <sup>ii</sup>    | 143.24(18) | O7 <sup>iii</sup> –Cd2–O3                | 166.71(16) |
| N4–Cd1–O6 <sup>ii</sup>                  | 93.2(2)    | Cd1 <sup>i</sup> –O1–Cd1                 | 105.3(2)   |
| O9–Cd1–O6 <sup>ii</sup>                  | 88.12(18)  | Cd2 <sup>vi</sup> –O7–Cd2 <sup>iii</sup> | 104.70(19) |
| N3–Cd1–O6 <sup>ii</sup>                  | 89.27(19)  | O4–Cd2–O5                                | 86.77(17)  |
| O1 <sup>i</sup> –Cd1–O10 <sup>ii</sup>   | 89.46(18)  | O7 <sup>iv</sup> –Cd2–O5                 | 144.55(17) |
| N4–Cd1–O10 <sup>ii</sup>                 | 83.3(2)    | N6 <sup>v</sup> –Cd2–O5                  | 88.1(2)    |
| O9–Cd1–O10 <sup>ii</sup>                 | 142.27(18) | N1–Cd2–O7 <sup>iii</sup>                 | 95.1(2)    |
| N3–Cd1–O10 <sup>ii</sup>                 | 88.0(2)    | O4–Cd2–O7 <sup>iii</sup>                 | 52.84(17)  |
| O6 <sup>ii</sup> –Cd1–O10 <sup>ii</sup>  | 54.16(17)  | O7 <sup>iv</sup> –Cd2–O7 <sup>iii</sup>  | 75.29(19)  |
| O1 <sup>i</sup> –Cd1–O1                  | 74.7(2)    | N6 <sup>v</sup> –Cd2–O7 <sup>iii</sup>   | 90.8(2)    |
| N4–Cd1–O1                                | 92.7(2)    | O5–Cd2–O7 <sup>iii</sup>                 | 139.37(16) |
| O9–Cd1–O1                                | 53.81(17)  | N1–Cd2–O3                                | 81.8(2)    |
| N3–Cd1–O1                                | 93.0(2)    | O4 <sup>iii</sup> –Cd2–O3                | 140.39(17) |
| O6 <sup>ii</sup> –Cd1–O1                 | 141.92(17) | O7 <sup>iv</sup> –Cd2–O3                 | 91.51(17)  |
| O10 <sup>ii</sup> –Cd1–O1                | 163.85(16) | N6 <sup>v</sup> –Cd2–O3                  | 89.2(2)    |
| Cd1 <sup>i</sup> –O1–Cd1                 | 105.3(2)   | O5–Cd2–O3                                | 53.92(16)  |
| Cd2 <sup>vi</sup> –O7–Cd2 <sup>iii</sup> | 104.70(19) | O7 <sup>iii</sup> –Cd2–O3                | 166.71(16) |

Symmetry codes to generate equivalent atoms: *i*:  $-x + 2, -y, -z + 1$ ; *ii*:  $-x + 1, -y, -z + 1$ ; *iii*:  $-x + 3, -y + 1, -z$ ; *iv*:  $x + 1, y, z$ ; *v*:  $x + 2, y + 1, z - 1$ ; *vi*:  $x - 1, y, z$ .

Table S5. Selected Bond distance (Å) and angle (°) data for **4**.

|                         |            |
|-------------------------|------------|
| Cd1–O4                  | 2.3022(14) |
| Cd1–N1                  | 2.3045(15) |
| Cd1–O3                  | 2.3269(13) |
| O4 <sup>i</sup> –Cd1–O4 | 180.0      |
| O4–Cd1–N1 <sup>i</sup>  | 85.90(5)   |
| O4–Cd1–N1               | 94.11(5)   |
| N1 <sup>i</sup> –Cd1–N1 | 180.0      |
| N1–Cd1–O3 <sup>i</sup>  | 87.36(5)   |
| O4 <sup>i</sup> –Cd1–O3 | 90.36(5)   |
| O4–Cd1–O3               | 89.64(5)   |
| N1–Cd1–O3               | 92.64(5)   |
| O3 <sup>i</sup> –Cd1–O3 | 180.0      |

Symmetry code to generate equivalent atoms: *i*:  $-x, -y, -z$ .

#### Infrared Spectral Bands for **1–4**:

**1**: IR (cm<sup>-1</sup>): 3224 (m, br), 2968 (m, br), 2229 (w, br), 1645 (w), 1586 (m), 1543 (s), 1417 (m), 1384 (s), 1230 (m), 1058 (m), 1021 (m), 887 (w), 864 (w), 820 (w), 769 (s), 687 (s), 665 (s).

**2**: IR (cm<sup>-1</sup>): 3361 (m, br), 1687 (w), 1609 (s), 1584 (m), 1547 (s), 1486 (m), 1395 (s), 1335 (m), 1307 (m), 1263 (w), 1196 (s), 1158 (w), 1119 (w), 1098 (w), 1048 (m), 1033 (m), 930 (w), 862 (s), 799 (w), 767 (s), 716 (s), 702 (s).

**3**: IR (cm<sup>-1</sup>): 3224 (m, br), 1673 (w), 1609 (s), 1585 (w), 1541 (s), 1395 (s), 1307 (m), 1263 (w), 1196 (m), 1157 (w), 1118 (w), 1098 (w), 1048 (m), 1032 (m), 863 (s), 796 (w), 769 (s), 716 (s), 702 (s).

**4**: IR (cm<sup>-1</sup>): 3066 (w, br), 1692 (m), 1595 (s), 1516 (s), 1431 (w), 1385 (m), 1335 (m), 1310 (s), 1275 (m), 1214 (s), 1130 (m), 1030 (w), 1016 (m), 964 (w), 900 (w), 834 (s), 729 (s), 698 (s).

Figure S1. Stacking diagram for coordination polymer ribbons in **1**, viewed down the *a* crystal axis.

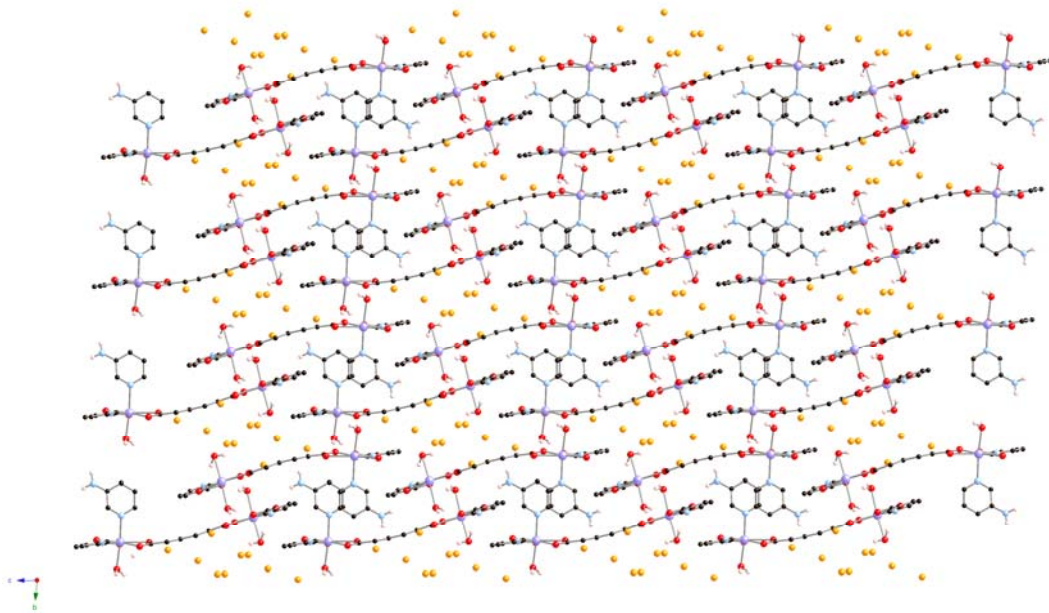

Figure S2. Stacking diagram for coordination polymer layers in **3**.

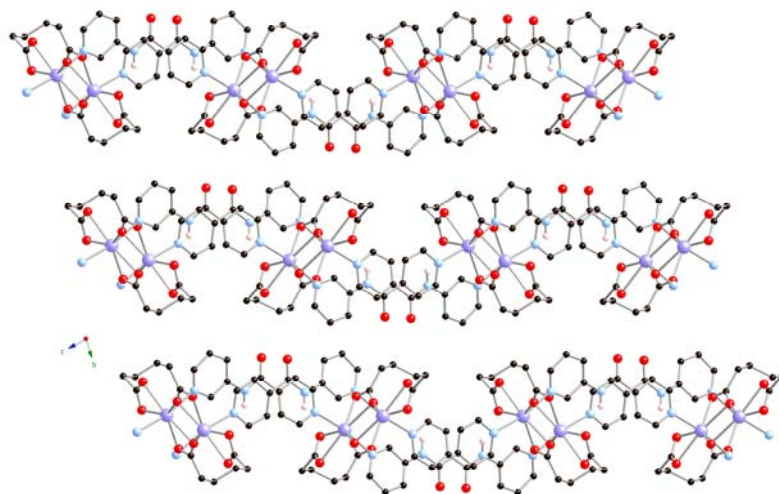

Figure S3. Stacking of coordination polymer chains in **4**. Hydrogen bonding is shown as dashed lines.

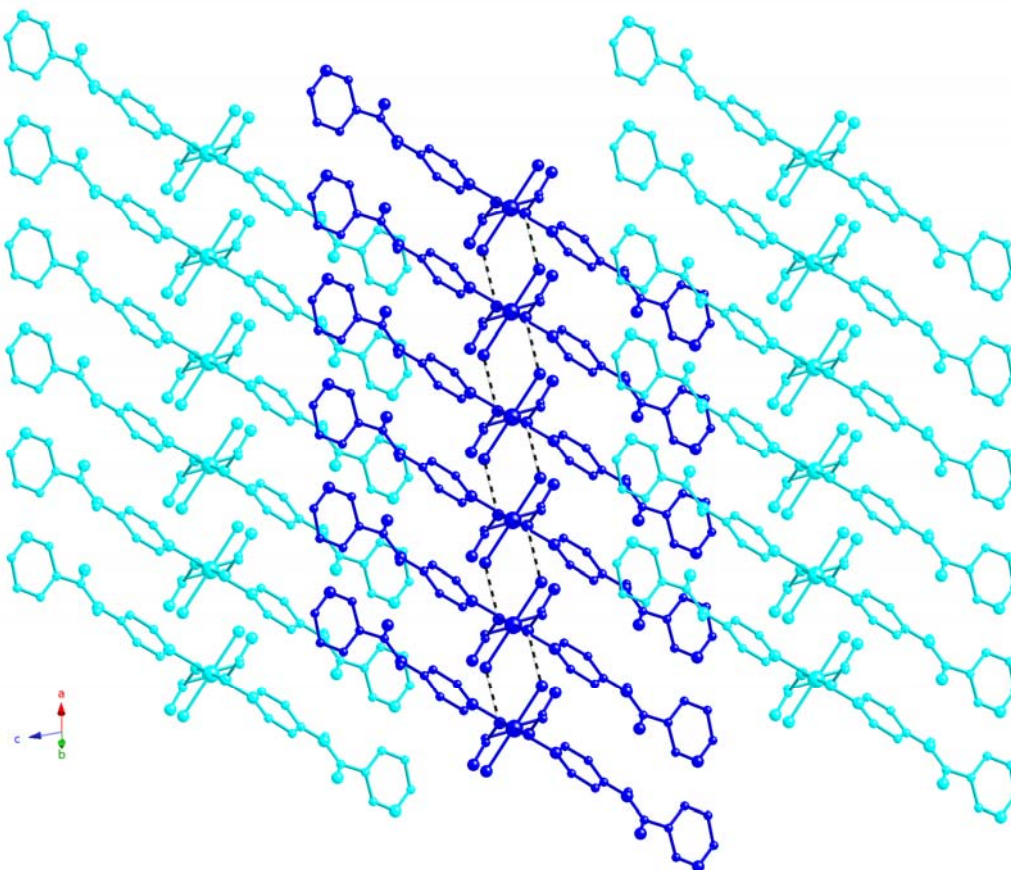



Figure S4. Emission spectrum of **1**.

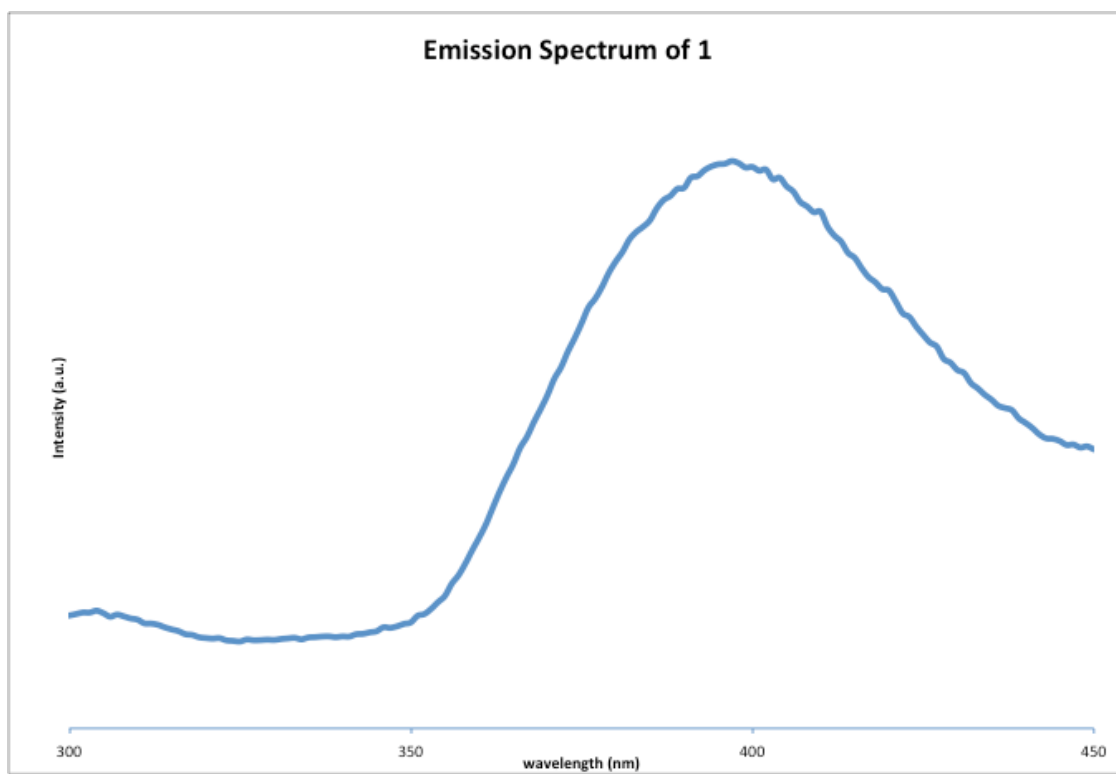

Figure S5. Emission spectrum of **2**.

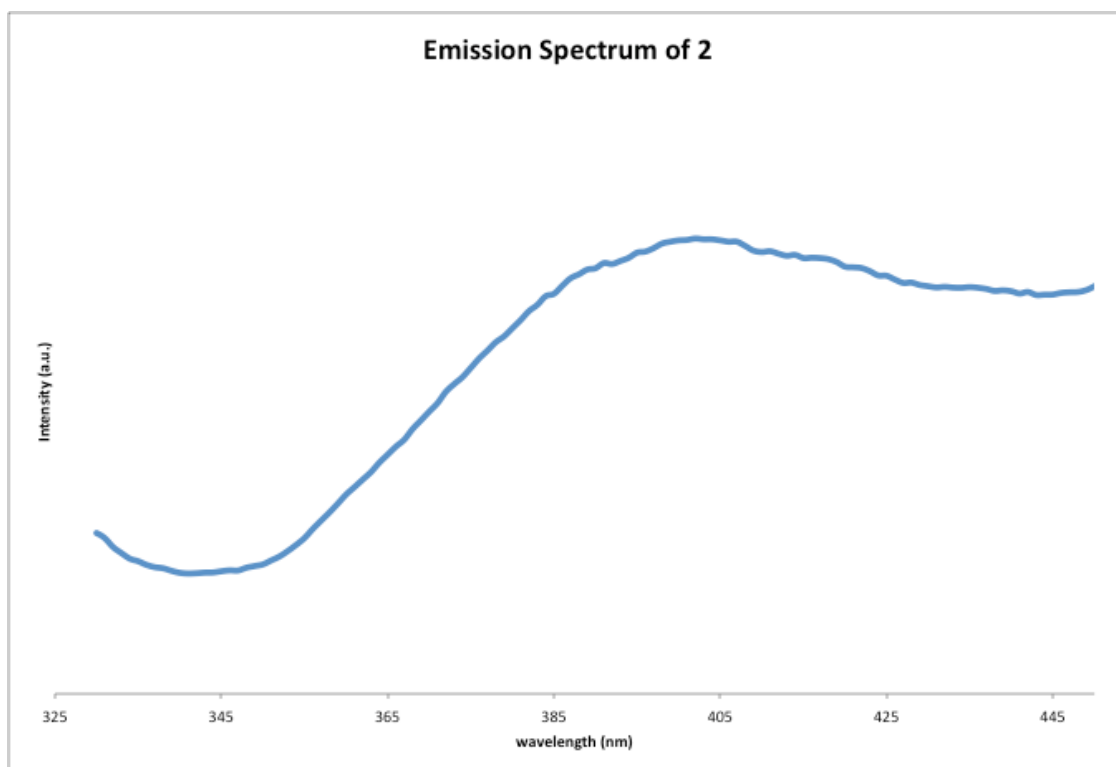

Figure S6. Emission spectrum of **3**.

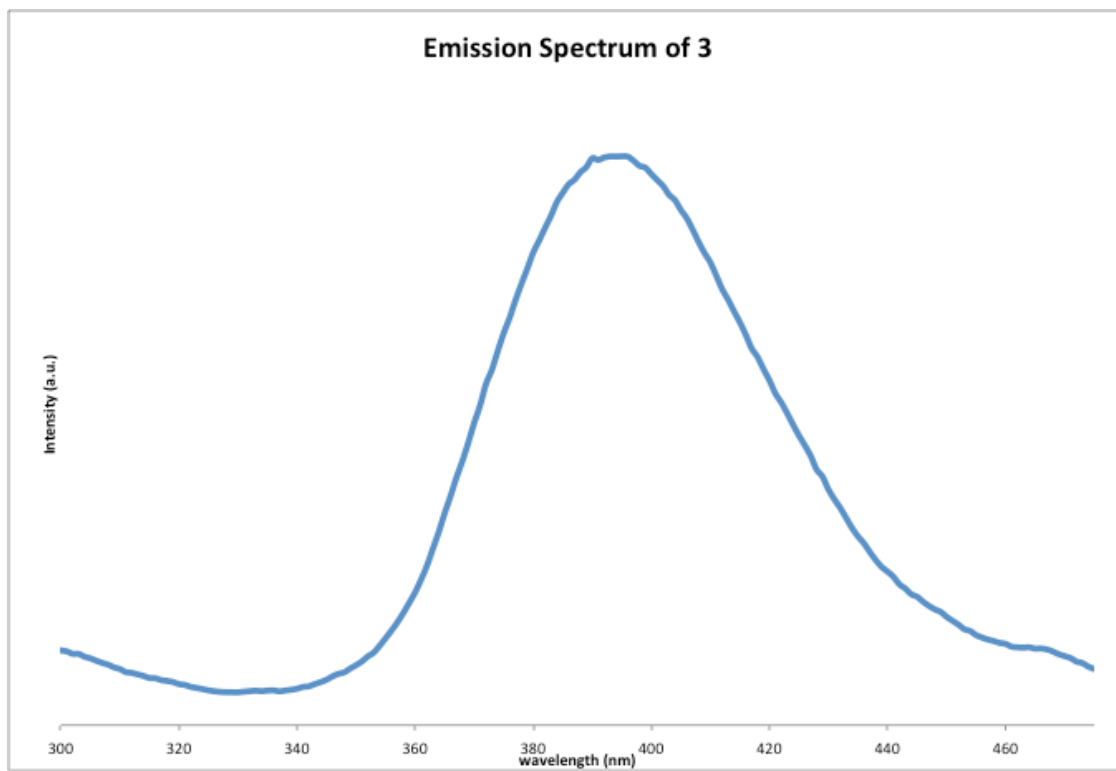

Figure S7. Emission spectrum of **4**.

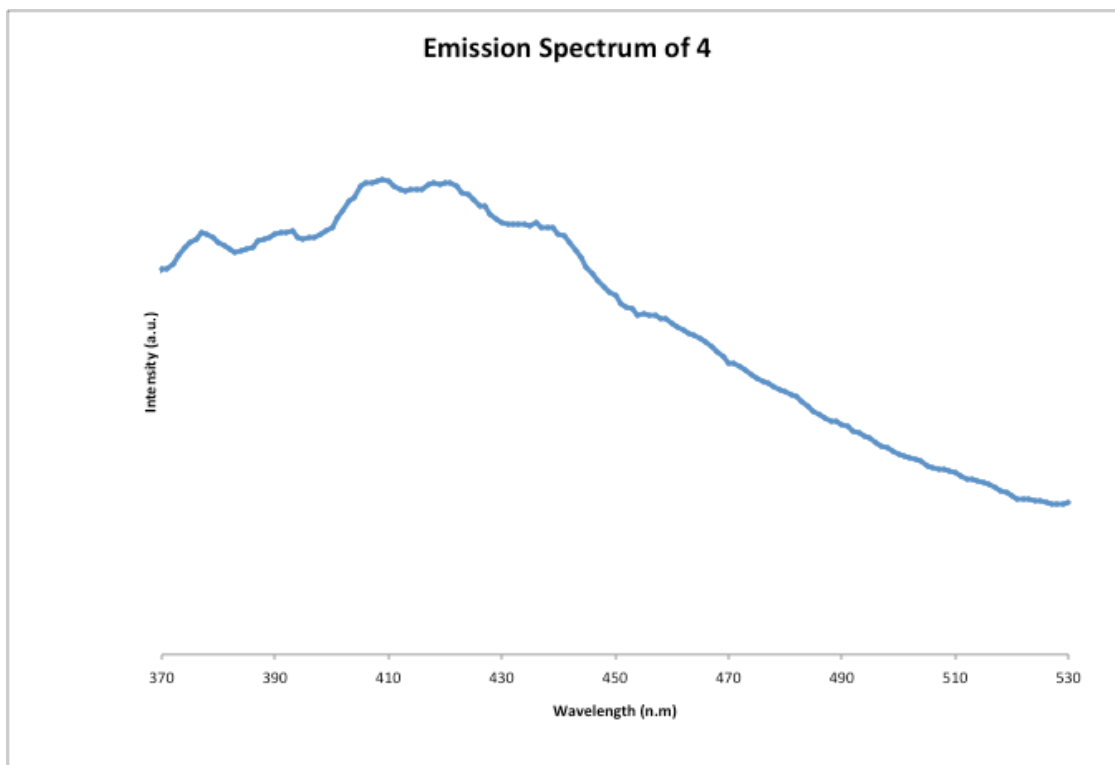

Figure S8. TGA trace for **1**.

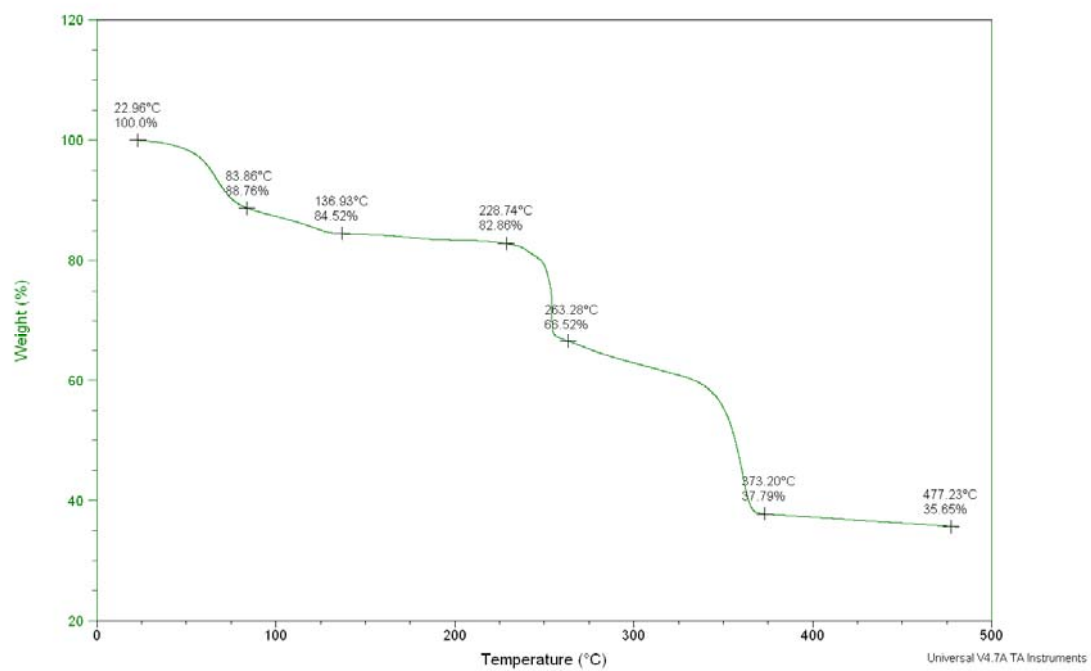

Figure S9. TGA trace for **2**.

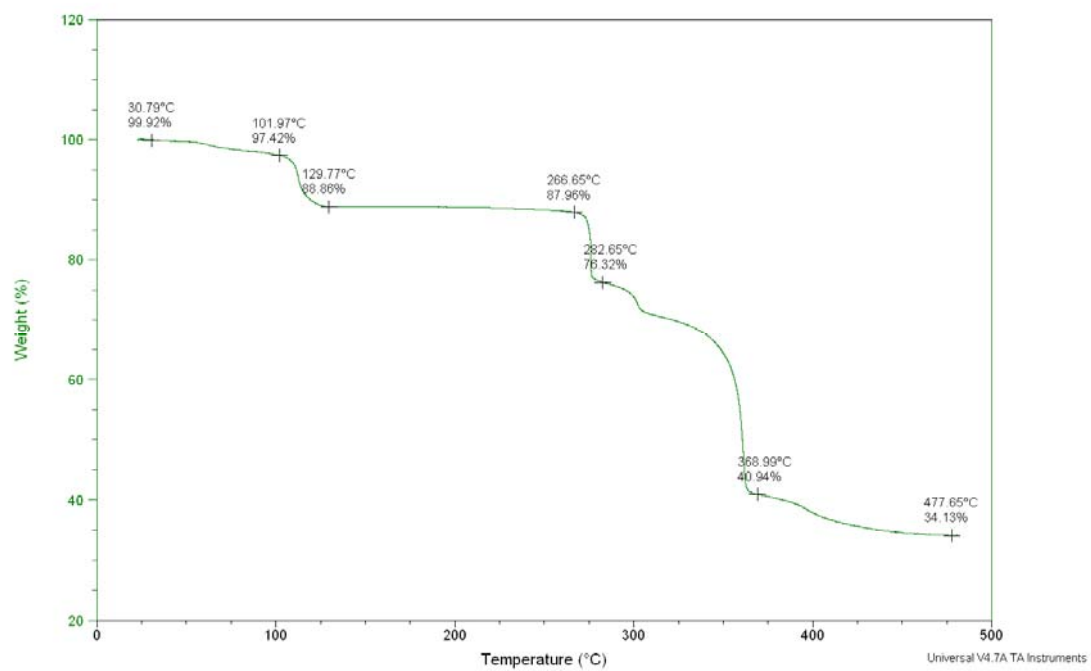

Figure S10. TGA trace for **3**.

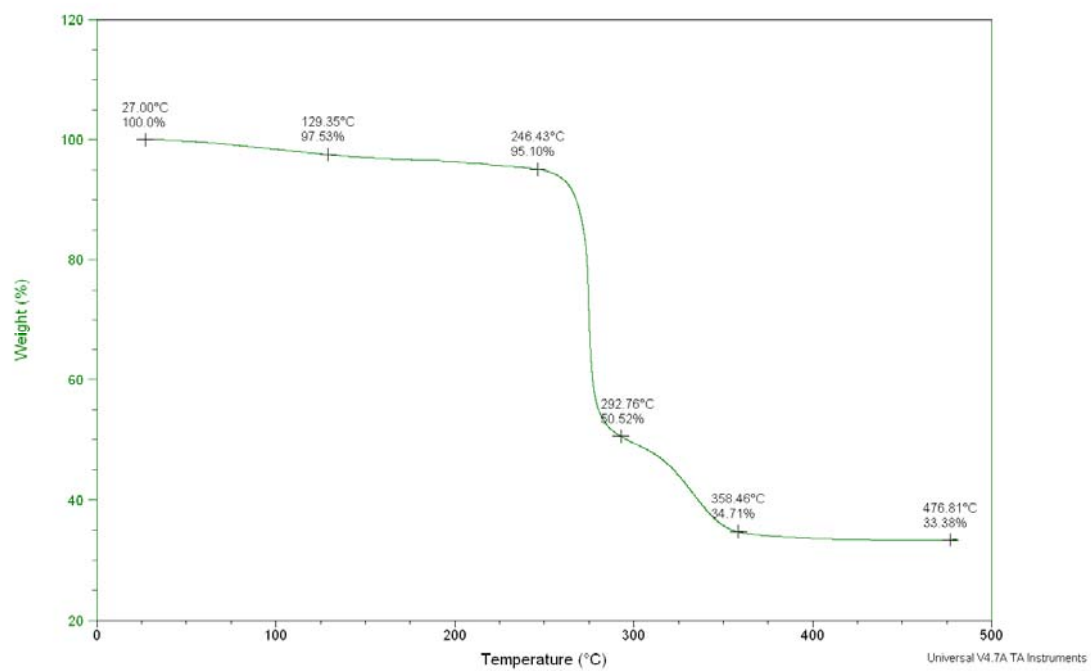

Figure S11. TGA trace for **4**.

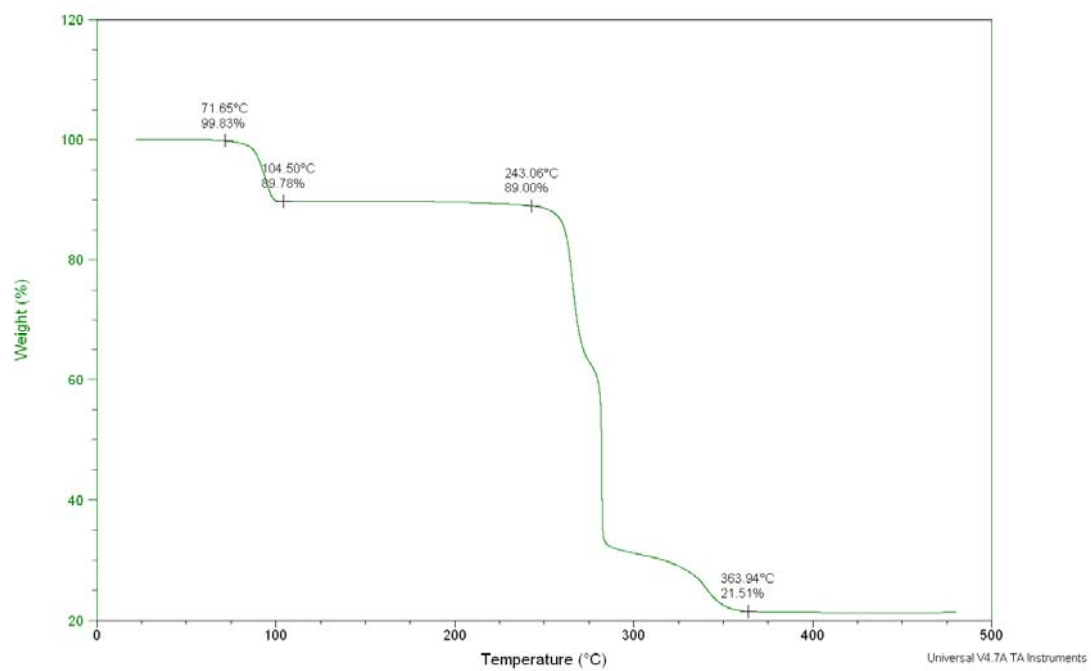

Supplement: c2ce26583d.pdf [file c2ce26583d.pdf]
